# Supplementary material for: Non-toxic sulfur inhibits LPS-induced inflammation by regulating TLR-4 and JAK2/STAT3 through IL-6 signaling
Source: PubMed Central journal article supplement — Mol Med Rep. 2021 Apr 27;24(1):485. doi: 10.3892/mmr.2021.12124 (PMC8127030; doi:10.3892/mmr.2021.12124), 2021-04-27

Figure S1. NTS inhibits BAX expression against LPS-induced cell death. Western blotting showing the inhibition of LPS-induced expression of BAX protein following treatment with 0.2 and 0.5  $\mu\text{g/ml}$  of NTS for 24 h. Relative expression levels of BAX protein were determined via densitometry and normalized to  $\beta$ -actin. Data are representative of three independent experiments. \*\* $P < 0.01$  and \*\*\* $P < 0.001$  vs. control. NTS, non-toxic sulfur; LPS, lipopolysaccharide; Con, control.

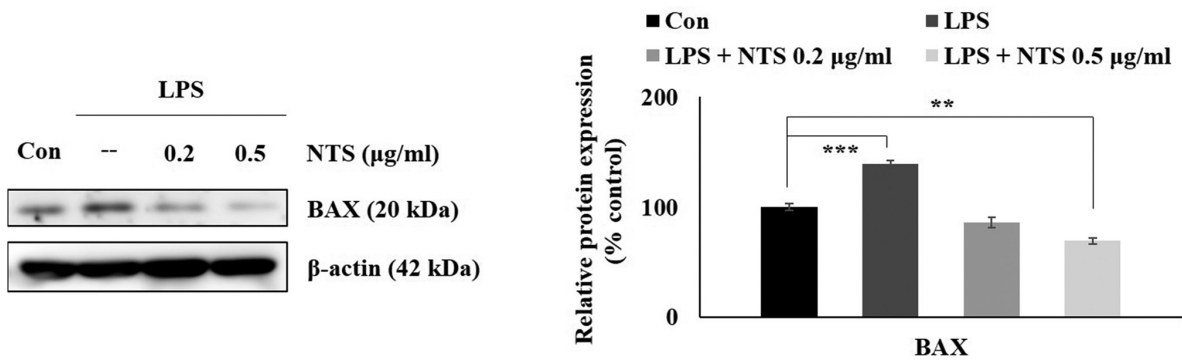

Supplement: Supplementary_Data.pdf [file Supplementary_Data.pdf]
